# Supplementary material for: Rapid genome sequencing identifies a novel de novo SNAP25 variant for neonatal congenital myasthenic syndrome
Source: PubMed Central journal article supplement — Cold Spring Harb Mol Case Stud. 2022 Dec;8(7):a006242. doi: 10.1101/mcs.a006242 (PMC9808558; doi:10.1101/mcs.a006242), 2022-12
Supplement: supp_mcs.a006242_Supplemental_Table_1.pdf [file supp_mcs.a006242_Supplemental_Table_1.pdf]

Arthrogryposis Panel

| Combined | GeneDx   | Blueprint Genetics | Fulgent | Prevention Genetics |
|----------|----------|--------------------|---------|---------------------|
| ACTA1    | ACTA1    | ACTA1              | ACTA1   |                     |
| ADGRG6   |          | ADGRG6             |         |                     |
| AGRN     | AGRN     | AGRN               | AGRN    |                     |
| ALG14    | ALG14    |                    |         |                     |
| ALG2     | ALG2     |                    |         |                     |
| ALG3     | ALG3     |                    |         |                     |
| ANTXR2   | ANTXR2   |                    |         |                     |
| BICD2    | BICD2    |                    |         |                     |
| BIN1     | BIN1     | BIN1               | BIN1    |                     |
| CACNA1E  |          | CACNA1E            |         |                     |
| CASK     |          | CASK               | CASK    |                     |
| CFL2     |          | CFL2               | CFL2    |                     |
| CHAT     | CHAT     | CHAT               | CHAT    |                     |
| CHMP1A   | CHMP1A   |                    |         |                     |
| CHRNA1   | CHRNA1   | CHRNA1             | CHRNA1  |                     |
| CHRN1    | CHRN1    | CHRN1              | CHRN1   |                     |
| CHRN2    | CHRN2    | CHRN2              | CHRN2   |                     |
| CHRN3    | CHRN3    | CHRN3              | CHRN3   |                     |
| CHRN4    | CHRN4    | CHRN4              | CHRN4   |                     |
| CHRN5    | CHRN5    | CHRN5              | CHRN5   |                     |
| CHRN6    | CHRN6    | CHRN6              | CHRN6   |                     |
| CHRN7    | CHRN7    | CHRN7              | CHRN7   |                     |
| CHRN8    | CHRN8    | CHRN8              | CHRN8   |                     |
| CHRN9    | CHRN9    | CHRN9              | CHRN9   |                     |
| CHST14   | CHST14   | CHST14             | CHST14  | CHST14              |
| CHUK     |          | CHUK               |         |                     |
| CNTN1    | CNTN1    |                    |         |                     |
| CNTNAP1  | CNTNAP1  | CNTNAP1            |         |                     |
| COL6A1   | COL6A1   |                    |         |                     |
| COL6A2   | COL6A2   | COL6A2             | COL6A2  |                     |
| COL6A3   | COL6A3   |                    |         |                     |
| COLQ     | COLQ     | COLQ               | COLQ    |                     |
| DHCR24   | DHCR24   | DHCR24             | DHCR24  |                     |
| DNM2     | DNM2     |                    |         |                     |
| DOK7     | DOK7     | DOK7               | DOK7    |                     |
| DPAGT1   | DPAGT1   | DPAGT1             | DPAGT1  |                     |
| ECEL1    | ECEL1    | ECEL1              | ECEL1   | ECEL1               |
| EGR2     | EGR2     | EGR2               | EGR2    |                     |
| ERBB3    |          | ERBB3              |         |                     |
| ERCC1    | ERCC1    |                    |         |                     |
| ERCC5    | ERCC5    | ERCC5              | ERCC5   |                     |
| ERCC6    | ERCC6    | ERCC6              | ERCC6   |                     |
| EXOSC3   | EXOSC3   | EXOSC3             | EXOSC3  |                     |
| FBN1     | FBN1     |                    |         |                     |
| FBN2     | FBN2     | FBN2               | FBN2    | FBN2                |
| FHL1     |          | FHL1               | FHL1    |                     |
| FKBP10   | FKBP10   | FKBP10             |         |                     |
| FKRP     | FKRP     |                    |         |                     |
| FKTN     | FKTN     | FKTN               | FKTN    |                     |
| FLVCR2   | FLVCR2   | FLVCR2             |         |                     |
| GBA      | GBA      | GBA                | GBA     |                     |
| GBE1     | GBE1     | GBE1               | GBE1    |                     |
| GFPT1    | GFPT1    | GFPT1              | GFPT1   |                     |
| GLDN     |          | GLDN               | GLDN    |                     |
| GLE1     | GLE1     | GLE1               | GLE1    |                     |
| GMPPB    | GMPPB    |                    |         |                     |
| IGHMBP2  | IGHMBP2  |                    |         |                     |
| KAT6B    | KAT6B    | KAT6B              | KAT6B   |                     |
| KIAA1109 |          | KIAA1109           |         |                     |
| KLHL40   | KLHL40   | KLHL40             | KLHL40  |                     |
| LG14     | LG14     | LG14               |         |                     |
| LMNA     | LMNA     | LMNA               |         |                     |
| LMOD3    | LMOD3    |                    |         |                     |
| LRP4     | LRP4     |                    |         |                     |
| MAGEL2   | MAGEL2   |                    |         |                     |
| MPZ      | MPZ      | MPZ                | MPZ     |                     |
| MTM1     | MTM1     | MTM1               | MTM1    |                     |
| MUSK     | MUSK     | MUSK               | MUSK    |                     |
| MYBPC1   | MYBPC1   | MYBPC1             | MYBPC1  | MYBPC1              |
| MYH2     | MYH2     | MYH2               | MYH2    |                     |
| MYH3     | MYH3     | MYH3               | MYH3    | MYH3                |
| MYH8     | MYH8     | MYH8               | MYH8    | MYH8                |
| NALCN    | NALCN    | NALCN              | NALCN   | NALCN               |
| NEB      | NEB      | NEB                | NEB     |                     |
| PIEZO2   | PIEZO2   | PIEZO2             | PIEZO2  | PIEZO2              |
| PIP5K1C  | PIP5K1C  |                    |         |                     |
| PLOD2    | PLOD2    | PLOD2              | PLOD2   |                     |
| PMM2     |          | PMM2               | PMM2    |                     |
| PPP3CA   |          | PPP3CA             |         |                     |
| RAPSN    | RAPSN    | RAPSN              | RAPSN   |                     |
| RARS2    |          | RARS2              | RARS2   |                     |
| RIPK4    | RIPK4    |                    |         |                     |
| SCO2     |          | SCO2               | SCO2    |                     |
| RVR1     | RVR1     |                    |         |                     |
| SCARF2   | SCARF2   |                    |         |                     |
| SCN4A    | SCN4A    |                    |         |                     |
| SELENON  | SELENON  | SELENON            | SELENON |                     |
| SMN1     |          | SMN1               |         |                     |
| SMN2     |          | SMN2               |         |                     |
| SKI      | SKI      |                    |         |                     |
| SLC35A3  | SLC35A3  |                    |         |                     |
| SLC39A13 | SLC39A13 |                    |         |                     |
| SLCSA7   | SLCSA7   |                    |         |                     |
| SOX10    | SOX10    |                    |         |                     |
| SYNE1    | SYNE1    |                    |         |                     |
| SYT2     | SYT2     |                    |         |                     |
| TGFB3    | TGFB3    | TGFB3              | TGFB3   |                     |
| TK2      |          | TK2                | TK2     |                     |
| TNNI2    | TNNI2    | TNNI2              | TNNI2   | TNNI2               |
| TNNT1    | TNNT1    | TNNT1              | TNNT1   |                     |
| TNNT3    | TNNT3    | TNNT3              | TNNT3   | TNNT3               |
| TPM2     | TPM2     | TPM2               | TPM2    | TPM2                |
| TPM3     | TPM3     | TPM3               | TPM3    |                     |
| TRIP4    | TRIP4    |                    |         |                     |
| TRPV4    | TRPV4    | TRPV4              | TRPV4   |                     |
| TSEN2    |          | TSEN2              | TSEN2   |                     |
| TSEN54   | TSEN54   | TSEN54             | TSEN54  |                     |
| ITN      | ITN      |                    |         |                     |
| UBA1     | UBA1     | UBA1               |         |                     |
| VIPAS39  | VIPAS39  | VIPAS39            |         |                     |
| VPS33B   | VPS33B   | VPS33B             | VPS33B  |                     |
| VRK1     |          | VRK1               | VRK1    |                     |
| ZBTB42   |          | ZBTB42             | ZBTB42  |                     |
| ZC4H2    | ZC4H2    | ZC4H2              |         |                     |
