# Supplementary material for: Rapid genome sequencing identifies a novel de novo SNAP25 variant for neonatal congenital myasthenic syndrome
Source: PubMed Central journal article supplement — Cold Spring Harb Mol Case Stud. 2022 Dec;8(7):a006242. doi: 10.1101/mcs.a006242 (PMC9808558; doi:10.1101/mcs.a006242), 2022-12
Supplement: supp_mcs.a006242_Supplemental_Table_2.pdf [file supp_mcs.a006242_Supplemental_Table_2.pdf]

| Alignstats Metrics        |         |        |        |
|---------------------------|---------|--------|--------|
| Metrics                   | Proband | Mother | Father |
| Mapped Reads (%)          | 99.63   | 99.65  | 99.67  |
| WGS Coverage Bases 20 (%) | 93.25   | 92.68  | 92.67  |
| WGS Coverage Bases 40 (%) | 85.82   | 77.73  | 79.95  |
| WGS Coverage Median       | 57.00   | 47.00  | 50.00  |
